# Supplementary material for: Controlled growth of 2D ultrathin Ga2O3crystals on liquid metal
Source: Royal Society of Chemistry journal article supplement (doi:10.1039/d1na00375e), 2021-01-01
Supplement: d1na00375e1.pdf [file d1na00375e1.pdf]

## Controlled growth of 2D ultrathin Ga<sub>2</sub>O<sub>3</sub> crystals on liquid metal

Menghan Li,<sup>a</sup> Lin Li,<sup>\*a</sup> Yixuan Fan,<sup>b</sup> Le Huang,<sup>c</sup> Dechao Geng,<sup>\*b</sup> and Wensheng Yang<sup>\*a</sup>

a. Institute of Molecular Plus, Tianjin University, Tianjin 300072, China

b. Tianjin Key Laboratory of Molecular Optoelectronic Sciences, Department of Chemistry, School of Science, Tianjin University, Tianjin 300072, China

c. School of Materials and Energy, Guangdong University of Technology, Guangzhou, Guangdong 510006, China

### Methods

*Preparation.* The commercial Ga pellet was divided into small droplets in hot ethanol. A droplet of Ga (10 mg) was then placed on a W foil (50 mm, cut into 100 cm squares). Before loading gallium, the W foils were ultrasonicated and rinsed with acetone, ethanol and deionized water prior to being dried under a nitrogen stream. The Ga pellets had a purity of 99.9999 wt.% and the W foils with a purity of 99.95 wt.% were purchased from Alfa Aesar China (Tianjin) Co. Ltd. And Shanghai Minor Metals Co. Ltd.

*CVD growth of Ga<sub>2</sub>O<sub>3</sub>.* The CVD growth of Ga<sub>2</sub>O<sub>3</sub> was carried out in a quartz tube furnace under ambient pressure. The growth protocol consisted of three steps: (1) heating the Ga-W substrates to 1020°C at a rate of 30–40°C/min under the flow of Ar; (2) exposure of the substrates to oxygen source at 1020°C for 30 min under the flow of Ar; and (3) cooling the substrates to room temperature at a rate of 20°C/min under Ar.

*Characterization.* Optical images were taken with an optical microscope (Olympus, Olympus DX51), and the SEM images were taken with a high-resolution SEM (Hitachi, SU8010) operating at 10 kV. Raman spectroscopy was performed with a laser micro-Raman spectrometer (Renishaw, Renishaw inVia, 532 nm excitation wavelength). The XRD spectra was performed on Rigaku SmartLab 9kw. XPS was performed on Kratos Analytical, the binding energies were calibrated by referencing the C 1s peak (284.8 eV).

*Transferring the two dimensional (2D) ultrathin Ga<sub>2</sub>O<sub>3</sub> crystals to the target substrates:* Apply the tape to the substrate on which the ultrathin crystals grow, and then peel it off

completely. Paste to Si/SiO<sub>2</sub>, then heat to 80 °C for 10 minutes, so the tape becomes less sticky, release the crystals, then remove the tape, ultra-thin crystals are left on Si/SiO<sub>2</sub> substrate.

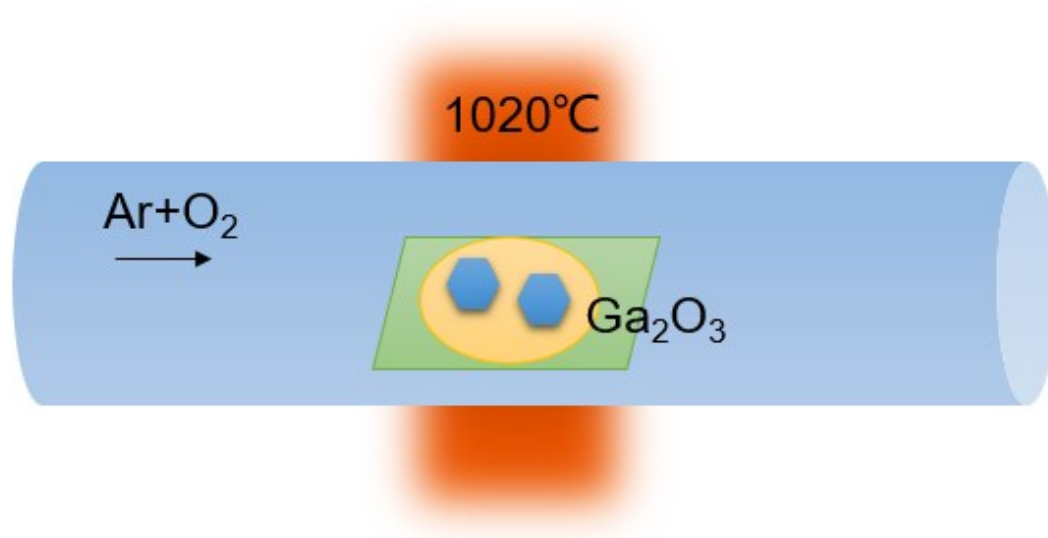

**Figure S1.** Sketch map of the CVD procedure for 2D ultrathin  $\text{Ga}_2\text{O}_3$  crystals at the ambient pressure.

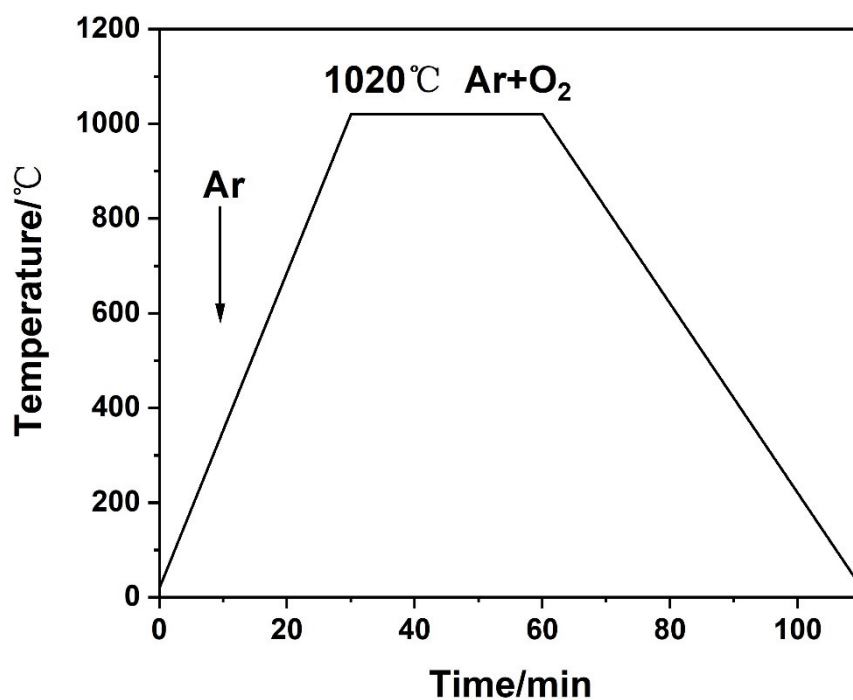

**Figure S2.** Schematic diagram of heating process of CVD system

Firstly, the Ga–W substrates (the W foil with a Ga pellet of 10 mg on its surface) were heated to 1020 °C in the Ar atmosphere. Then, the Ga spreads over the entire substrate by itself into uniform and ultra-flat surface at elevated temperature due to the good wettability onto the W. The liquid gallium was then held at 1020 °C for 30 minutes, oxygen (10 sccm) was then pumped in to initiate the growth. Thereinto, with the surficial atomic Ga layer serving as templates and reacts with oxygen, high-quality 2D ultrathin Ga<sub>2</sub>O<sub>3</sub> crystals can be obtained. Finally, the sample is quickly moved out of the high temperature zone and rapidly cooled in the environment to retain the crystals.

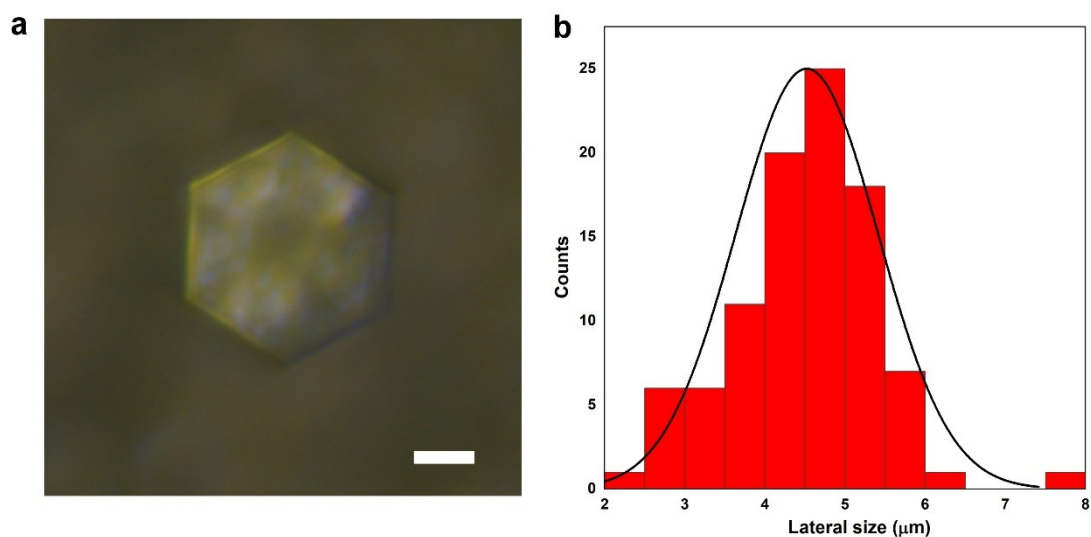

**Figure S3.** (a) Optical images of  $\alpha$ - $\text{Ga}_2\text{O}_3$  crystals. (b) Statistical distributions of the lateral size 2D ultrathin  $\text{Ga}_2\text{O}_3$  crystals. The scale bar in (a) is 2  $\mu\text{m}$ .

The Figure S3a shows an optical image of a single hexagonal ultrathin  $\text{Ga}_2\text{O}_3$  sheet. The morphology and regularity of the crystal can be seen. The lateral size distributions of 2D ultrathin  $\text{Ga}_2\text{O}_3$  crystals on liquid Ga are analyzed. The statistical results shown in Figure S3b indicated the distribution of the grain sizes, where the average value of them was calculated to be 4.5  $\mu\text{m}$ .

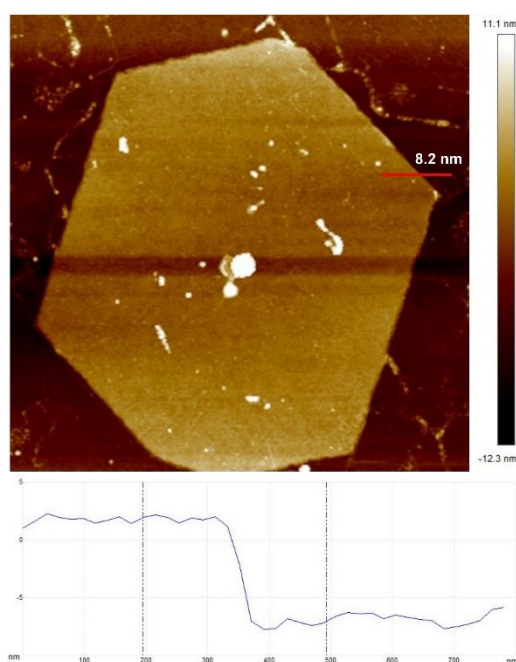

**Figure S4.** Thickness measurement of  $\text{Ga}_2\text{O}_3$  sheet. It is noted that the thickness is around 8 nm.

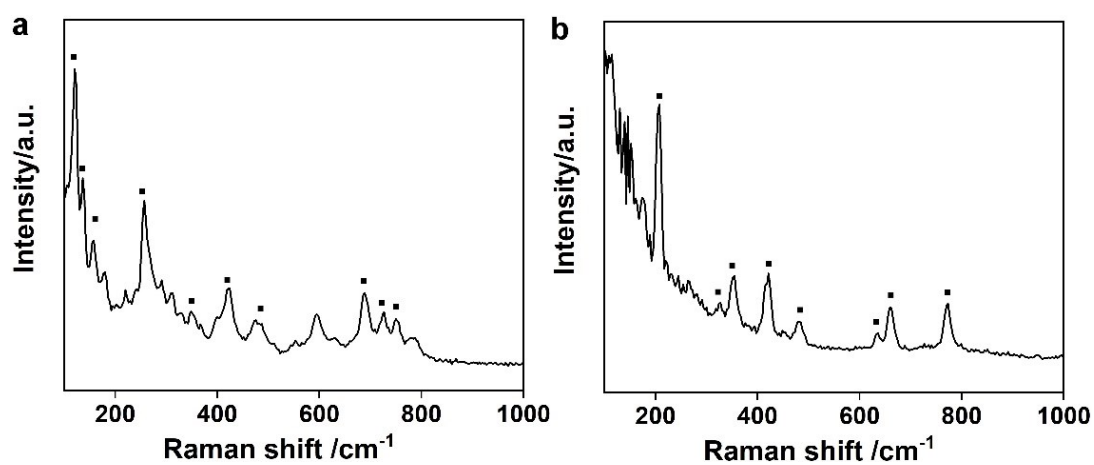

**Figure S5.** Raman spectrum of  $\alpha\text{-Ga}_2\text{O}_3$  and  $\beta\text{-Ga}_2\text{O}_3$ , respectively.

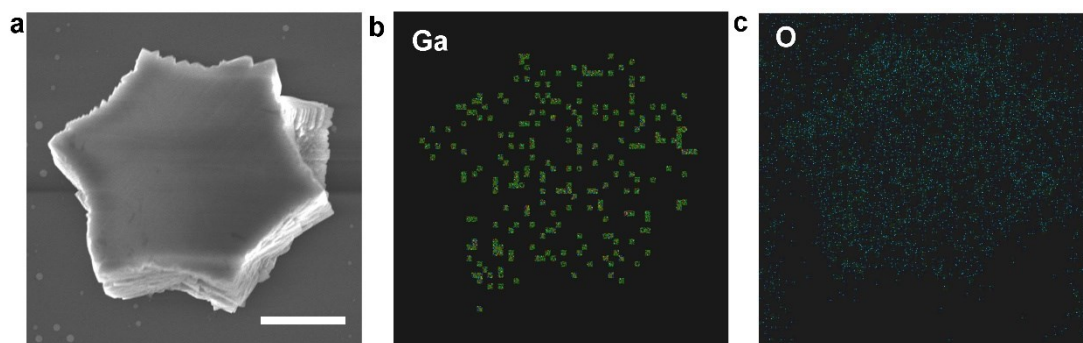

**Figure S6.** EDS mapping of the as grown Ga<sub>2</sub>O<sub>3</sub> crystal. (a) SEM images of the hexagonal  $\alpha$ -Ga<sub>2</sub>O<sub>3</sub> crystal.(b), (c) EDS elemental mapping of Ga and O. The scale bar is 2  $\mu$ m.

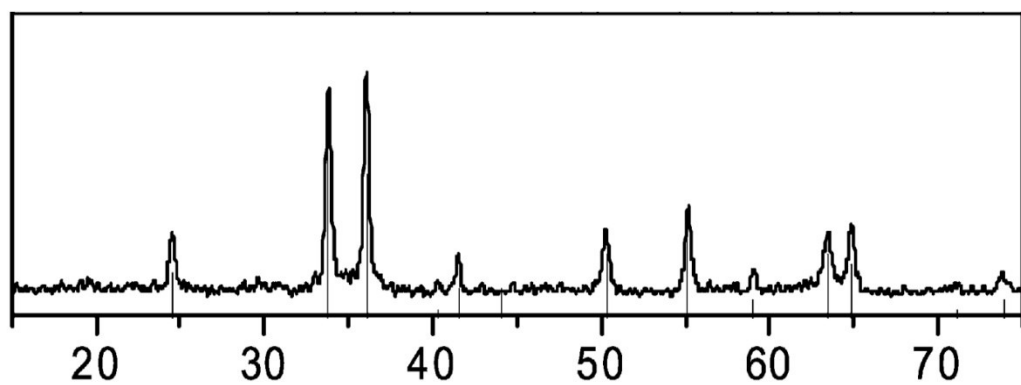

Figure S7. XRD spectrum of  $\alpha$ -Ga<sub>2</sub>O<sub>3</sub> crystals.

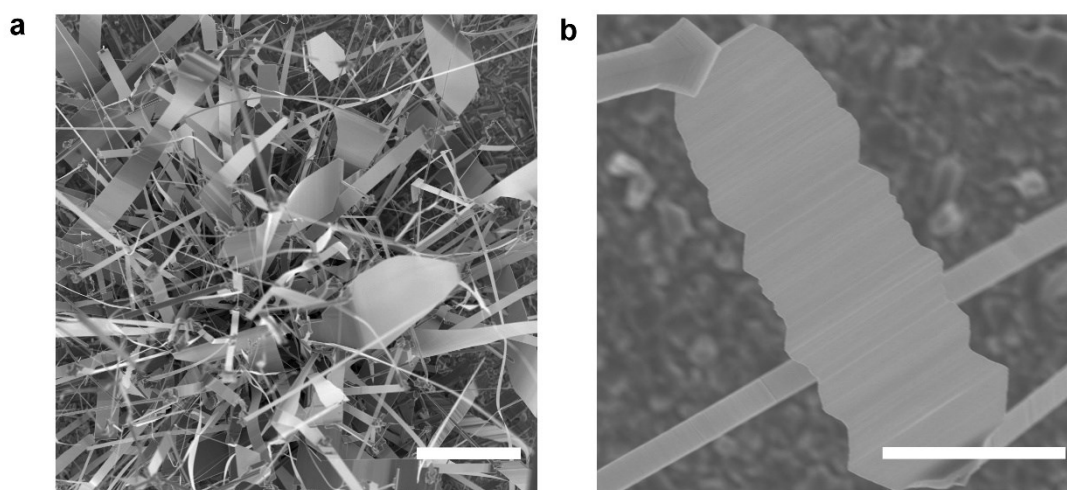

**Figure S8.** (a), (b) SEM images of  $\beta$ -Ga<sub>2</sub>O<sub>3</sub> nanosheets. The scale bars in (a) is 20  $\mu$ m and in (b) is 5  $\mu$ m.

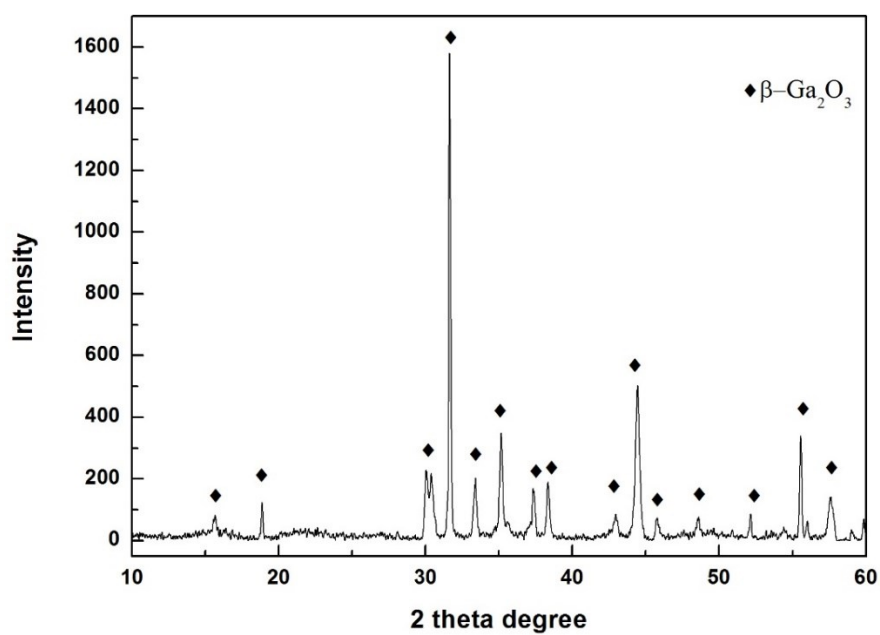

**Figure S9.** XRD spectrum of  $\beta$ -Ga<sub>2</sub>O<sub>3</sub> crystals.

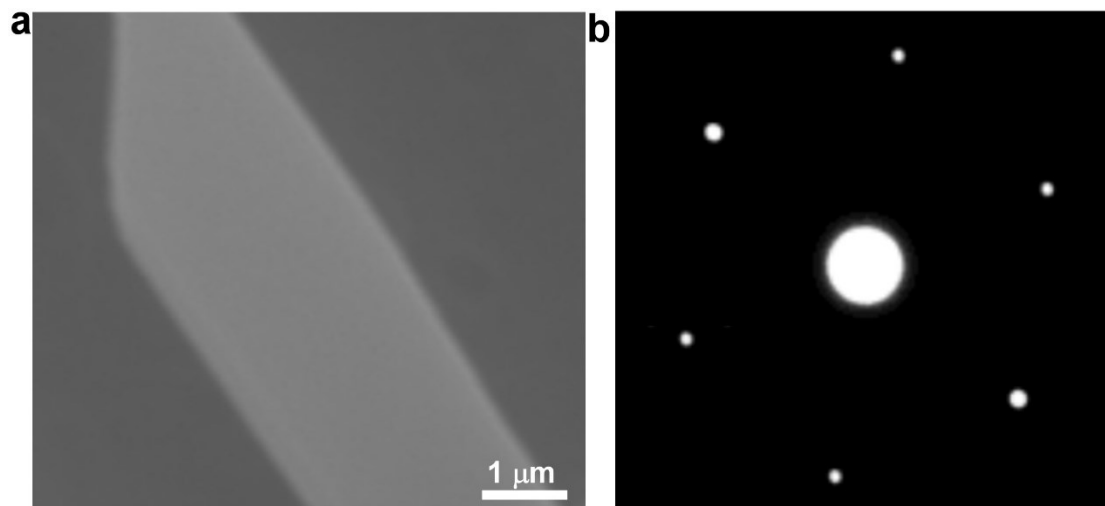

**Figure S10.** TEM measurement of the as-grown  $\beta$ -Ga<sub>2</sub>O<sub>3</sub> samples.

**Table S1 Effect of gas velocity on crystal thickness**

| Ga/mg | Ar/sccm | O <sub>2</sub> /sccm | Temperature/°C | Growing time | crystal thickness |
|-------|---------|----------------------|----------------|--------------|-------------------|
|       |         |                      |                | /min         | /nm               |
| 10    | 100     | 5                    | 1020           | 30           | 20                |
| 10    | 150     | 8                    | 1020           | 30           | 15                |
| 10    | 200     | 12                   | 1020           | 30           | 8                 |

**Table S2 Effect of oxygen content on crystal morphology**

| Ga/mg | Ar/sccm | O <sub>2</sub> /sccm | Temperature/°C | Growing time/min | Crystal morphology        |
|-------|---------|----------------------|----------------|------------------|---------------------------|
| 10    | 200     | 5                    | 1020           | 30               | small, irregularly shaped |
| 10    | 200     | 8                    | 102            | 30               | suborbicular              |
| 10    | 200     | 13                   | 1020           | 30               | hexagonal                 |
